# Supplementary material for: Cationic polymer-grafted graphene oxide/CNT cathode-coating material for lithium–sulfur batteries
Source: Royal Society of Chemistry journal article supplement (doi:10.1039/d1ra03744g), 2021-01-01
Supplement: d1ra03744g1.pdf [file d1ra03744g1.pdf]

## Supporting Information

# Cationic Polymer-Grafted Graphene Oxide/CNT Cathode Coating Material for Lithium Sulfur Batteries

*Daun Jeong<sup>a</sup>, Dong Gi Hong<sup>a</sup>, Jinsol Yook<sup>a</sup>, Chan Yeong Koong<sup>a</sup>, Soohyun Kim<sup>b</sup>, Ki-Hyun  
Kim<sup>b</sup>, Kwonnam Sohn<sup>b</sup>, and Jong-Chan Lee<sup>\*a</sup>*

[a] School of Chemical and Biological Engineering and Institute of Chemical Processes,  
Seoul National University, Seoul 08826, Republic of Korea.

[b] LG Energy Solution, E5 Block LG Science Park, 30, Magokjungang 10-ro, Gangseo-gu,  
Seoul 07796, Republic of Korea

| Samples | Carbon (wt%) | Hydrogen (wt%) | Oxygen (wt%) | Nitrogen (wt%) |
|---------|--------------|----------------|--------------|----------------|
| GO      | 50.429       | 3.4172         | 46.025       | 0.1285         |
| CPGO    | 52.527       | 4.2629         | 39.961       | 3.2487         |

**Table S1.** Elemental analysis results of GO and CPGO.

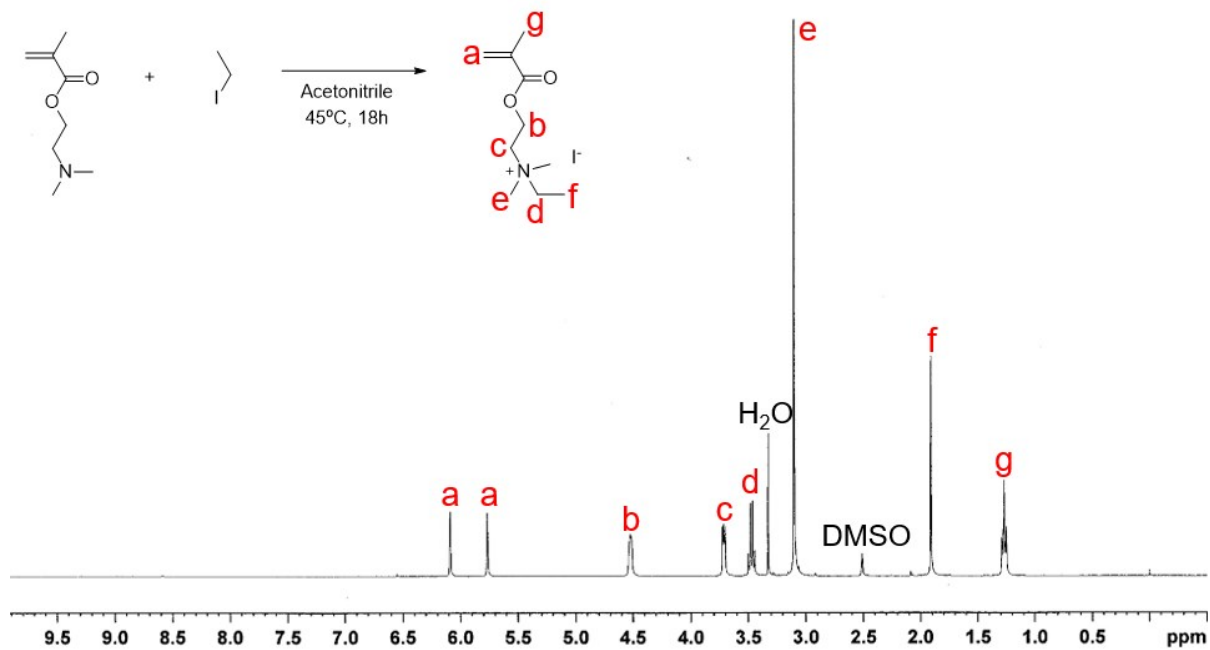

**Figure S1.** Synthetic scheme and <sup>1</sup>H NMR spectrum of QDMAEMA.

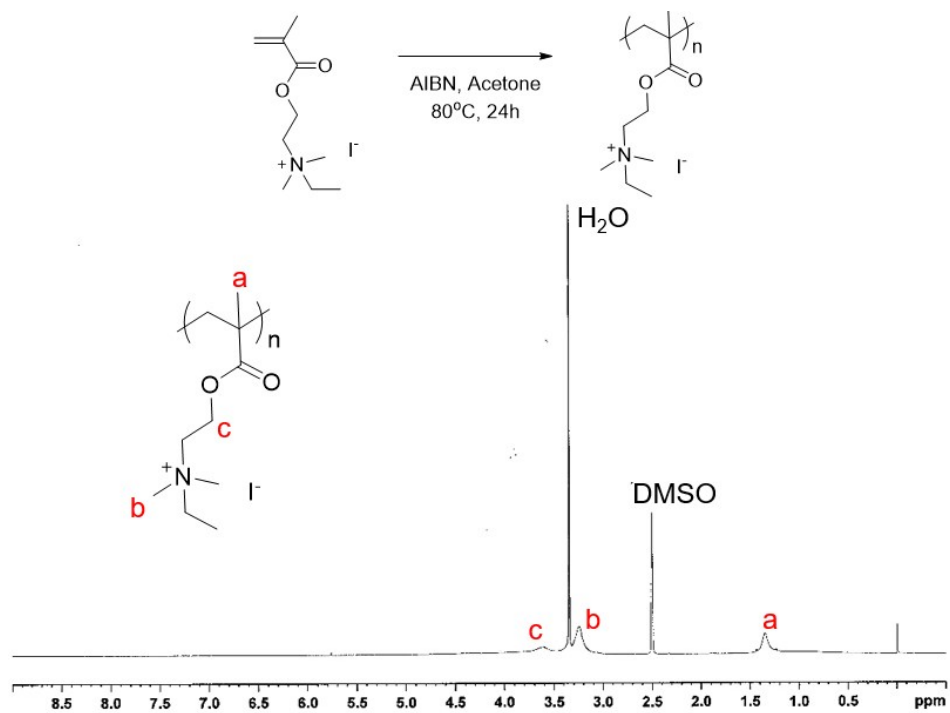

**Figure S2.** Synthetic scheme and  $^1\text{H}$  NMR spectrum of PQDMAEMA.

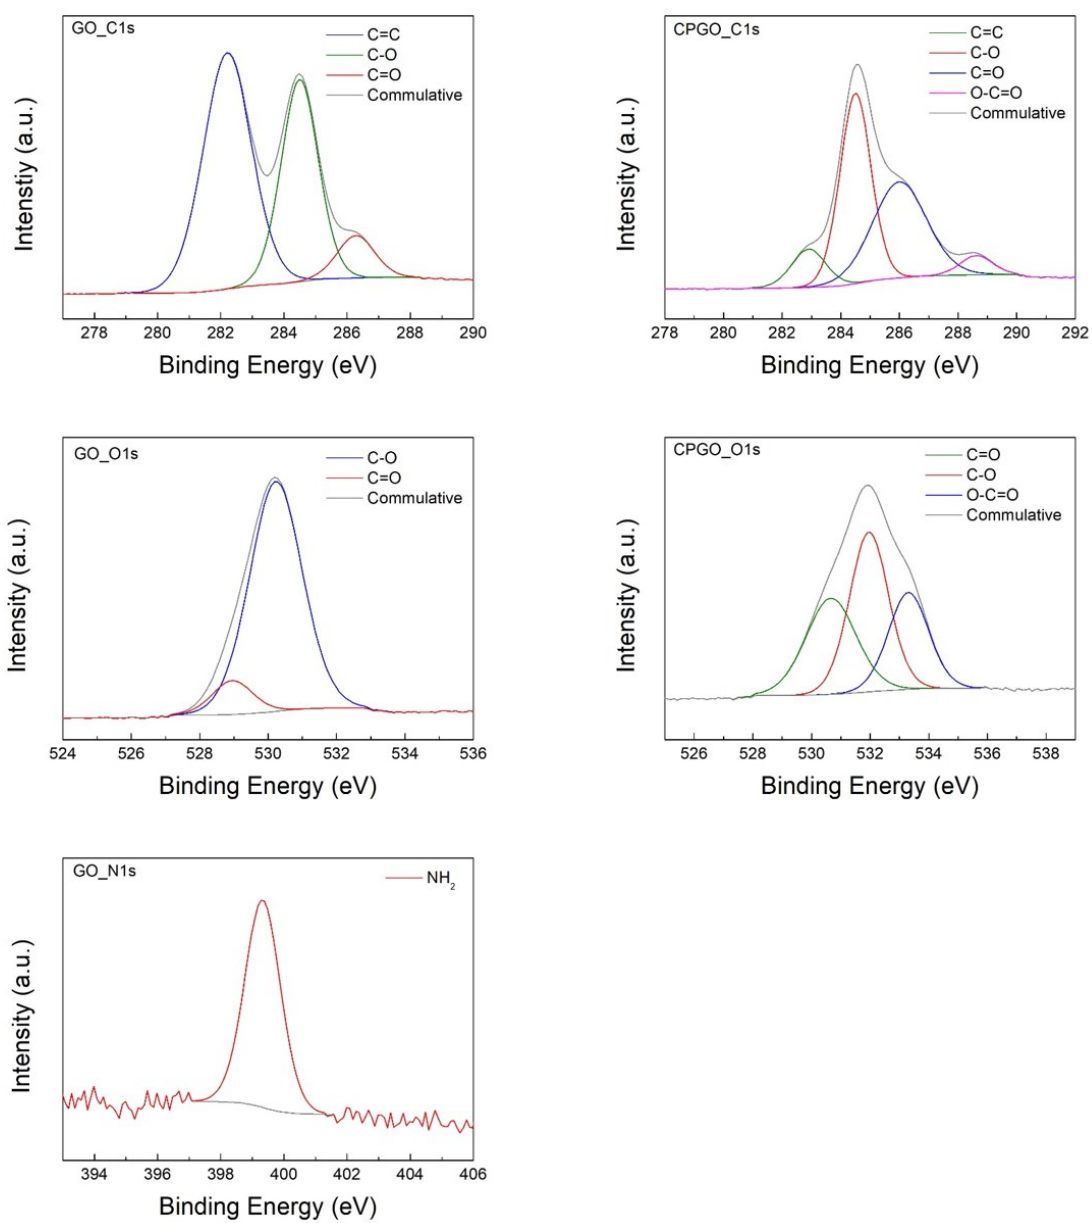

**Figure S3.** C1s and O1s XPS spectra of GO and CPGO, N1s XPS spectrum of GO.

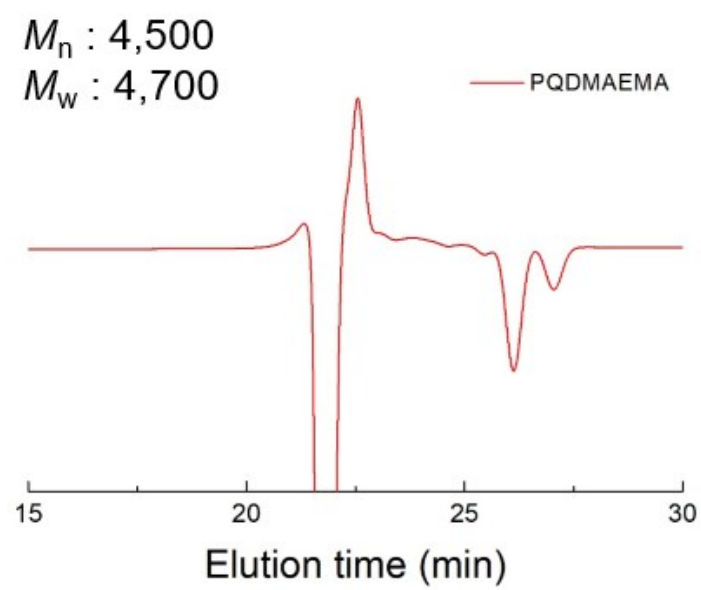

**Figure S4.** GPC profiles of the grafted cationic polymer (PQDMAEMA) hydrolyzed from CPGO.

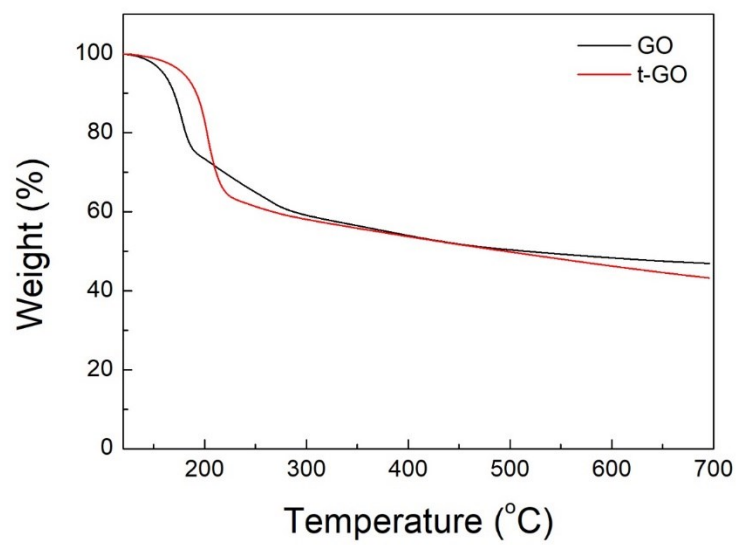

**Figure S5.** TGA profiles of GO and t-GO.

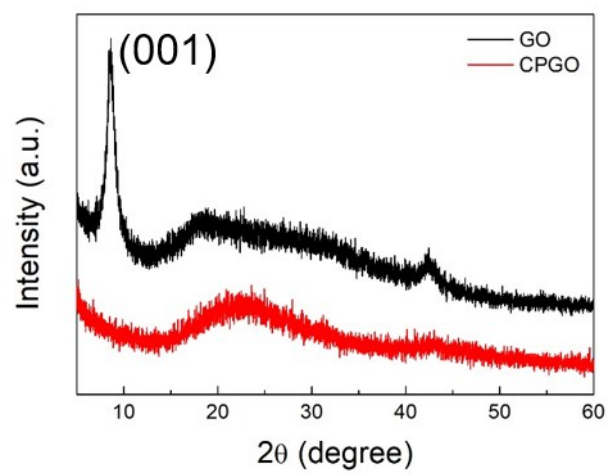

**Figure S6.** XRD patterns of GO and CPGO.



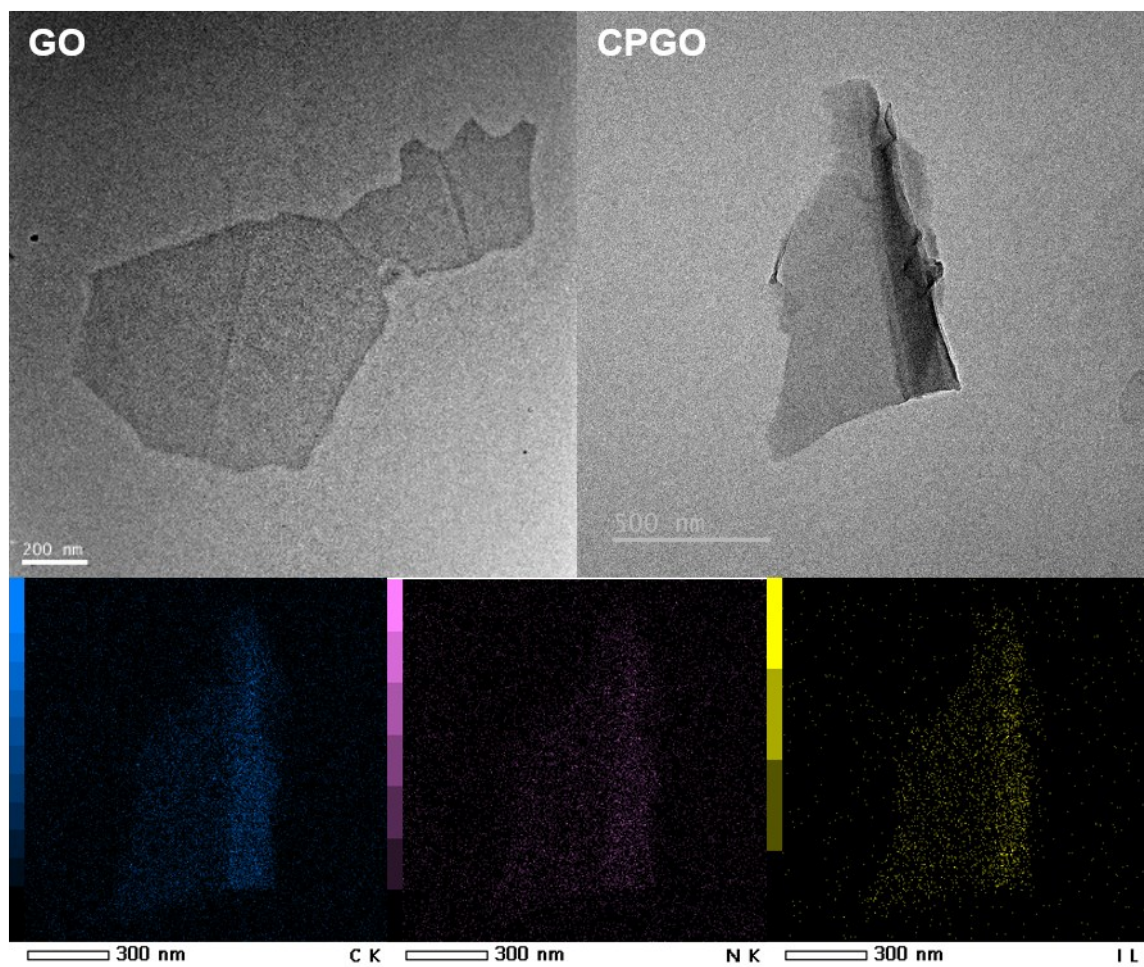

**Figure S7.** TEM image of GO and TEM image of CPGO with EDS mapping.

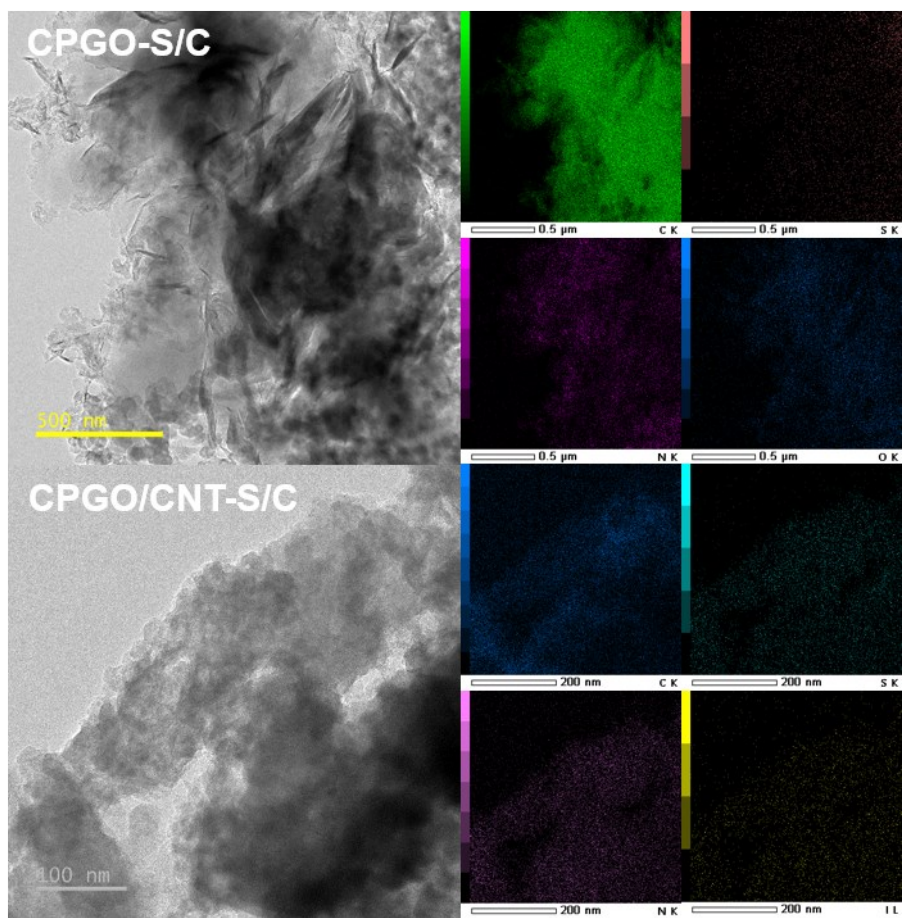

**Figure S8.** TEM images with EDS mapping results of CPGO-S/C and CPGO/CNT-S/C.

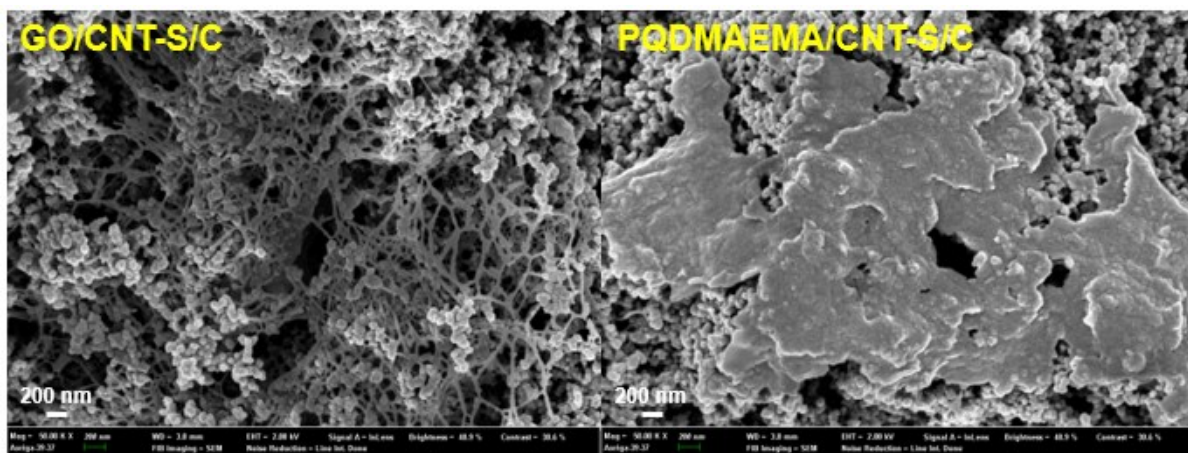

**Figure S9.** SEM images of cathodes prepared with GO/CNT-S/C and PQDMAEMA/CNT-S/C.

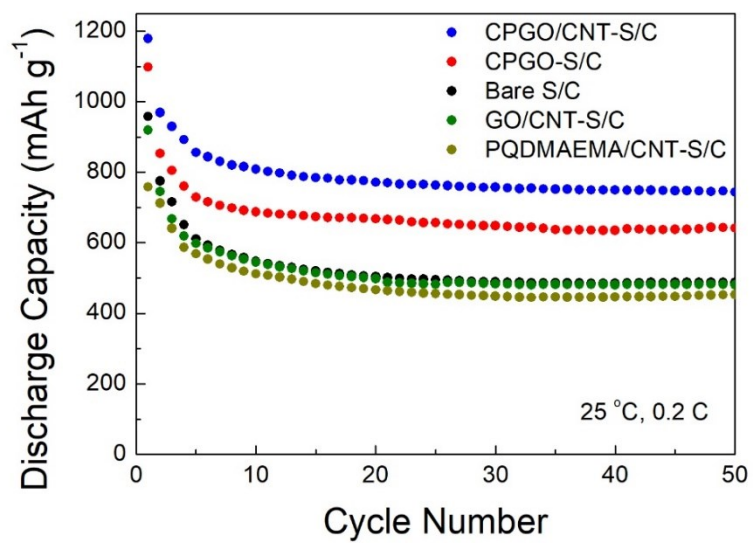

**Figure S10.** Cycle performance of lithium sulfur batteries assembled with bare S/C, CPGO-S/C, CPGO/CNT-S/C, GO/CNT-S/C, and PQDMAEMA/CNT-S/C cathodes.

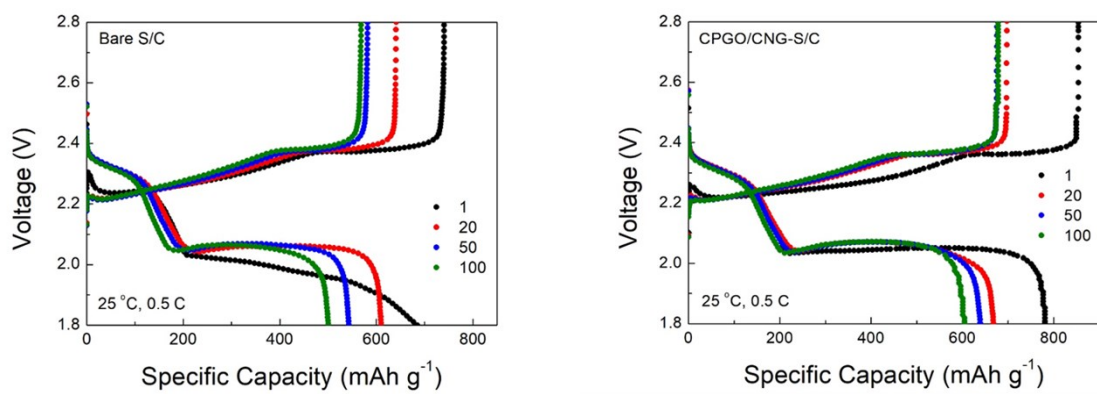

**Figure S11.** Charge-discharge curves of the cells with bare S/C and CPGO/CNT-S/C cathode at 0.5 C.

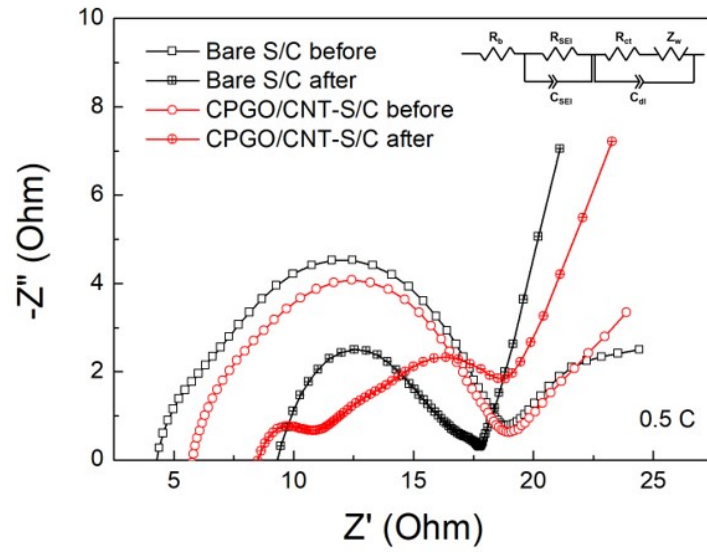

**Figure S12.** EIS spectra of the cells with bare S/C or CPGO/CNT-S/C cathodes before and after 120 cycles cycled at 0.5 C.
